# Supplementary material
Source: publisher figshare collection journal article supplement (https://springernature.figshare.com/articles/dataset/_/12562670)
Supplement: Supplementary file 1 [file 1]

Archive with 9 entries (9 files):
- overview_document.pdf
- overview_document.tex
- runTimehipSYCL-ComputeCpp-Stacked-GPU.py
- runTimehipSYCL-ComputeCpp-CPU.py
- process_csvs.py
- ComputeCpp-sycl-bench-CPU.csv
- ComputeCpp-sycl-bench-GPU.csv
- hipSYCL-sycl-bench-CPU.csv
- hipSYCL-sycl-bench-GPU.csv
