# Supplementary material
Source: publisher figshare collection journal article supplement (https://springernature.figshare.com/articles/dataset/_/12562670)
Supplement: Supplementary file 1 [file 1 › ComputeCpp-sycl-bench-CPU.csv]

# Benchmark name	Verification	device-name	kernel-time-mean	kernel-time-median	kernel-time-min	kernel-time-samples	kernel-time-stddev	kernel-time-throughput	local-size	problem-size	run-time-mean	run-time-median	run-time-min	run-time-samples	run-time-stddev	run-time-throughput	sycl-implementation	throughput-metric
LinearRegressionCoeff_fp32	N/A	Intel(R) Xeon(R) CPU E5-2699 v3 @ 2.30GHz	N/A	N/A	N/A	N/A	N/A	N/A	256	2097152	0.007870	0.007821	0.006726	"0.006726 0.007514 0.007519 0.007637 0.007664 0.007821 0.008098 0.008229 0.008621 0.008871 "	0.000615	N/A	ComputeCpp	N/A
LinearRegression_fp32	N/A	Intel(R) Xeon(R) CPU E5-2699 v3 @ 2.30GHz	N/A	N/A	N/A	N/A	N/A	N/A	256	131072	1.333100	1.332486	1.332137	"1.332137 1.332221 1.332270 1.332317 1.332466 1.332486 1.332728 1.332828 1.335076 1.336468 "	0.001462	N/A	ComputeCpp	N/A
MedianFilter	N/A	Intel(R) Xeon(R) CPU E5-2699 v3 @ 2.30GHz	N/A	N/A	N/A	N/A	N/A	N/A	256	4096	0.100517	0.100589	0.099003	"0.099003 0.099781 0.100192 0.100445 0.100565 0.100589 0.100922 0.101037 0.101242 0.101391 "	0.000721	N/A	ComputeCpp	N/A
MolecularDynamics	N/A	Intel(R) Xeon(R) CPU E5-2699 v3 @ 2.30GHz	N/A	N/A	N/A	N/A	N/A	N/A	256	4194304	0.051455	0.051601	0.050114	"0.050114 0.050338 0.050928 0.051167 0.051305 0.051601 0.051898 0.052139 0.052273 0.052784 "	0.000853	N/A	ComputeCpp	N/A
ScalarProduct_Hierarchical_int32	N/A	Intel(R) Xeon(R) CPU E5-2699 v3 @ 2.30GHz	N/A	N/A	N/A	N/A	N/A	N/A	256	4194304	0.005889	0.005634	0.005542	"0.005542 0.005559 0.005594 0.005608 0.005627 0.005634 0.005635 0.005984 0.006366 0.007343 "	0.000572	N/A	ComputeCpp	N/A
ScalarProduct_NDRange_int32	N/A	Intel(R) Xeon(R) CPU E5-2699 v3 @ 2.30GHz	N/A	N/A	N/A	N/A	N/A	N/A	256	4194304	0.005090	0.004841	0.004677	"0.004677 0.004684 0.004690 0.004825 0.004840 0.004841 0.004892 0.005357 0.005417 0.006673 "	0.000616	N/A	ComputeCpp	N/A
Sobel3	N/A	Intel(R) Xeon(R) CPU E5-2699 v3 @ 2.30GHz	N/A	N/A	N/A	N/A	N/A	N/A	256	4096	0.174158	0.173946	0.172412	"0.172412 0.172541 0.173766 0.173839 0.173844 0.173946 0.174889 0.175278 0.175415 0.175646 "	0.001138	N/A	ComputeCpp	N/A
Sobel5	N/A	Intel(R) Xeon(R) CPU E5-2699 v3 @ 2.30GHz	N/A	N/A	N/A	N/A	N/A	N/A	256	4096	0.223255	0.224007	0.221404	"0.221404 0.221815 0.222225 0.222412 0.222584 0.224007 0.224087 0.224504 0.224705 0.224811 "	0.001294	N/A	ComputeCpp	N/A
Sobel7	N/A	Intel(R) Xeon(R) CPU E5-2699 v3 @ 2.30GHz	N/A	N/A	N/A	N/A	N/A	N/A	256	4096	0.416534	0.416939	0.412748	"0.412748 0.414089 0.416286 0.416512 0.416694 0.416939 0.417735 0.417823 0.418257 0.418260 "	0.001814	N/A	ComputeCpp	N/A
VectorAddition_int32	N/A	Intel(R) Xeon(R) CPU E5-2699 v3 @ 2.30GHz	N/A	N/A	N/A	N/A	N/A	N/A	256	4194304	0.001988	0.002010	0.001785	"0.001785 0.001993 0.001993 0.001997 0.002010 0.002010 0.002013 0.002021 0.002024 0.002029 "	0.000072	N/A	ComputeCpp	N/A
Polybench_2DConvolution	N/A	Intel(R) Xeon(R) CPU E5-2699 v3 @ 2.30GHz	N/A	N/A	N/A	N/A	N/A	N/A	256	8192	0.119632	0.118998	0.117438	"0.117438 0.117805 0.117983 0.118258 0.118817 0.118998 0.119106 0.119879 0.122999 0.125035 "	0.002465	N/A	ComputeCpp	N/A
Polybench_2mm	N/A	Intel(R) Xeon(R) CPU E5-2699 v3 @ 2.30GHz	N/A	N/A	N/A	N/A	N/A	N/A	256	1024	0.066209	0.066626	0.064949	"0.064949 0.064989 0.065119 0.065217 0.065715 0.066626 0.066851 0.067003 0.067431 0.068187 "	0.001160	N/A	ComputeCpp	N/A
Polybench_3DConvolution	N/A	Intel(R) Xeon(R) CPU E5-2699 v3 @ 2.30GHz	N/A	N/A	N/A	N/A	N/A	N/A	256	1024	0.296144	0.296361	0.294541	"0.294541 0.294691 0.295674 0.295692 0.295896 0.296361 0.296493 0.296543 0.296888 0.298657 "	0.001172	N/A	ComputeCpp	N/A
Polybench_3mm	N/A	Intel(R) Xeon(R) CPU E5-2699 v3 @ 2.30GHz	N/A	N/A	N/A	N/A	N/A	N/A	256	1024	0.097498	0.097255	0.096204	"0.096204 0.096308 0.096438 0.096608 0.096800 0.097255 0.098243 0.098338 0.098963 0.099825 "	0.001264	N/A	ComputeCpp	N/A
Polybench_Atax	N/A	Intel(R) Xeon(R) CPU E5-2699 v3 @ 2.30GHz	N/A	N/A	N/A	N/A	N/A	N/A	256	8192	0.022629	0.022796	0.021864	"0.021864 0.021935 0.022069 0.022397 0.022653 0.022796 0.022839 0.022920 0.023267 0.023551 "	0.000563	N/A	ComputeCpp	N/A
Polybench_Bicg	N/A	Intel(R) Xeon(R) CPU E5-2699 v3 @ 2.30GHz	N/A	N/A	N/A	N/A	N/A	N/A	256	16384	0.082337	0.082468	0.081234	"0.081234 0.081291 0.082174 0.082363 0.082456 0.082468 0.082519 0.082519 0.082664 0.083686 "	0.000696	N/A	ComputeCpp	N/A
Polybench_Correlation	N/A	Intel(R) Xeon(R) CPU E5-2699 v3 @ 2.30GHz	N/A	N/A	N/A	N/A	N/A	N/A	256	1024	0.087108	0.087088	0.085989	"0.085989 0.086234 0.086469 0.086477 0.086721 0.087088 0.087110 0.087343 0.088316 0.089332 "	0.001024	N/A	ComputeCpp	N/A
Polybench_Covariance	N/A	Intel(R) Xeon(R) CPU E5-2699 v3 @ 2.30GHz	N/A	N/A	N/A	N/A	N/A	N/A	256	1024	0.087093	0.086783	0.085375	"0.085375 0.085670 0.086463 0.086682 0.086761 0.086783 0.087076 0.087616 0.087757 0.090752 "	0.001485	N/A	ComputeCpp	N/A
Polybench_Fdtd2d	N/A	Intel(R) Xeon(R) CPU E5-2699 v3 @ 2.30GHz	N/A	N/A	N/A	N/A	N/A	N/A	256	1024	1.135682	1.136192	1.125296	"1.125296 1.134054 1.134878 1.135316 1.136190 1.136192 1.137624 1.137714 1.138358 1.141196 "	0.004180	N/A	ComputeCpp	N/A
Polybench_Gemm	N/A	Intel(R) Xeon(R) CPU E5-2699 v3 @ 2.30GHz	N/A	N/A	N/A	N/A	N/A	N/A	256	1024	0.034298	0.033809	0.033630	"0.033630 0.033649 0.033719 0.033779 0.033791 0.033809 0.034424 0.034810 0.035145 0.036227 "	0.000862	N/A	ComputeCpp	N/A
Polybench_Gesummv	N/A	Intel(R) Xeon(R) CPU E5-2699 v3 @ 2.30GHz	N/A	N/A	N/A	N/A	N/A	N/A	256	16384	0.086555	0.087739	0.081311	"0.081311 0.082754 0.084325 0.084637 0.085542 0.087739 0.087865 0.088840 0.090450 0.092087 "	0.003428	N/A	ComputeCpp	N/A
Polybench_Gramschmidt	N/A	Intel(R) Xeon(R) CPU E5-2699 v3 @ 2.30GHz	N/A	N/A	N/A	N/A	N/A	N/A	256	1024	2.272064	2.272684	2.247238	"2.247238 2.259744 2.265529 2.266559 2.270442 2.272684 2.274592 2.276873 2.286885 2.300094 "	0.014449	N/A	ComputeCpp	N/A
Polybench_Mvt	N/A	Intel(R) Xeon(R) CPU E5-2699 v3 @ 2.30GHz	N/A	N/A	N/A	N/A	N/A	N/A	256	16384	0.050034	0.049895	0.049498	"0.049498 0.049498 0.049603 0.049826 0.049857 0.049895 0.050093 0.050188 0.050515 0.051368 "	0.000567	N/A	ComputeCpp	N/A
Polybench_Syr2k	N/A	Intel(R) Xeon(R) CPU E5-2699 v3 @ 2.30GHz	N/A	N/A	N/A	N/A	N/A	N/A	256	1024	0.090315	0.090199	0.089858	"0.089858 0.089908 0.089958 0.090160 0.090175 0.090199 0.090302 0.090332 0.090415 0.091839 "	0.000567	N/A	ComputeCpp	N/A
Polybench_Syrk	N/A	Intel(R) Xeon(R) CPU E5-2699 v3 @ 2.30GHz	N/A	N/A	N/A	N/A	N/A	N/A	256	1024	0.088119	0.088011	0.087739	"0.087739 0.087772 0.087832 0.087884 0.087961 0.088011 0.088035 0.088107 0.088514 0.089338 "	0.000482	N/A	ComputeCpp	N/A
