# Supplementary material
Source: publisher figshare collection journal article supplement (https://springernature.figshare.com/articles/dataset/_/12562670)
Supplement: Supplementary file 1 [file 1 › ComputeCpp-sycl-bench-GPU.csv]

# Benchmark name	Verification	device-name	kernel-time-mean	kernel-time-median	kernel-time-min	kernel-time-samples	kernel-time-stddev	kernel-time-throughput	local-size	problem-size	run-time-mean	run-time-median	run-time-min	run-time-samples	run-time-stddev	run-time-throughput	sycl-implementation	throughput-metric
LinearRegressionCoeff_fp32	N/A	GeForce GTX TITAN X	0.000780	0.000819	0.000713	"0.000713 0.000714 0.000715 0.000737 0.000818 0.000819 0.000819 0.000820 0.000820 0.000821 "	0.000052	N/A	256	2097152	0.326513	0.356701	0.083456	"0.083456 0.327598 0.355902 0.356097 0.356571 0.356701 0.356701 0.356814 0.357520 0.357766 "	0.085893	N/A	ComputeCpp	N/A
LinearRegression_fp32	N/A	GeForce GTX TITAN X	0.088565	0.088975	0.086369	"0.086369 0.086694 0.087081 0.088636 0.088923 0.088975 0.089332 0.089429 0.089553 0.090653 "	0.001394	N/A	256	131072	0.099731	0.100327	0.094386	"0.094386 0.100315 0.100316 0.100316 0.100324 0.100327 0.100328 0.100328 0.100328 0.100337 "	0.001878	N/A	ComputeCpp	N/A
MedianFilter	N/A	GeForce GTX TITAN X	0.003744	0.003745	0.003739	"0.003739 0.003742 0.003742 0.003742 0.003743 0.003745 0.003746 0.003747 0.003747 0.003748 "	0.000003	N/A	256	4096	0.093862	0.101685	0.023273	"0.023273 0.101622 0.101626 0.101670 0.101685 0.101685 0.101697 0.101716 0.101730 0.101918 "	0.024803	N/A	ComputeCpp	N/A
MolecularDynamics	N/A	GeForce GTX TITAN X	0.002147	0.002147	0.002143	"0.002143 0.002146 0.002146 0.002146 0.002147 0.002147 0.002148 0.002149 0.002150 0.002151 "	0.000002	N/A	256	4194304	0.002319	0.002314	0.002305	"0.002305 0.002307 0.002310 0.002311 0.002314 0.002314 0.002316 0.002320 0.002328 0.002360 "	0.000016	N/A	ComputeCpp	N/A
ScalarProduct_Hierarchical_int32	N/A	GeForce GTX TITAN X	0.000678	0.000679	0.000676	"0.000676 0.000677 0.000678 0.000678 0.000678 0.000679 0.000679 0.000679 0.000679 0.000680 "	0.000001	N/A	256	4194304	0.031887	0.025386	0.025363	"0.025363 0.025378 0.025380 0.025383 0.025386 0.025386 0.025387 0.025389 0.025393 0.090424 "	0.020568	N/A	ComputeCpp	N/A
ScalarProduct_NDRange_int32	N/A	GeForce GTX TITAN X	0.000436	0.000436	0.000434	"0.000434 0.000434 0.000434 0.000435 0.000435 0.000436 0.000437 0.000437 0.000438 0.000438 "	0.000002	N/A	256	4194304	0.025591	0.025389	0.009652	"0.009652 0.016115 0.023393 0.024386 0.024396 0.025389 0.025393 0.025398 0.025400 0.056391 "	0.012020	N/A	ComputeCpp	N/A
Sobel3	N/A	GeForce GTX TITAN X	0.016748	0.016750	0.016735	"0.016735 0.016737 0.016740 0.016743 0.016743 0.016750 0.016750 0.016757 0.016758 0.016764 "	0.000010	N/A	256	4096	0.093896	0.101681	0.023586	"0.023586 0.101637 0.101656 0.101679 0.101680 0.101681 0.101684 0.101689 0.101694 0.101972 "	0.024704	N/A	ComputeCpp	N/A
Sobel5	N/A	GeForce GTX TITAN X	0.031110	0.031366	0.030673	"0.030673 0.030678 0.030713 0.030797 0.031357 0.031366 0.031369 0.031380 0.031384 0.031387 "	0.000342	N/A	256	4096	0.097129	0.101695	0.042836	"0.042836 0.101647 0.101675 0.101679 0.101688 0.101695 0.101703 0.101717 0.101949 0.114704 "	0.019508	N/A	ComputeCpp	N/A
Sobel7	N/A	GeForce GTX TITAN X	0.051735	0.051554	0.051511	"0.051511 0.051523 0.051525 0.051539 0.051553 0.051554 0.051589 0.051663 0.052074 0.052818 "	0.000416	N/A	256	4096	0.097813	0.101707	0.062768	"0.062768 0.101680 0.101694 0.101702 0.101705 0.101707 0.101711 0.101713 0.101722 0.101730 "	0.012314	N/A	ComputeCpp	N/A
VectorAddition_int32	N/A	GeForce GTX TITAN X	0.000183	0.000183	0.000182	"0.000182 0.000182 0.000183 0.000183 0.000183 0.000183 0.000183 0.000183 0.000184 0.000184 "	0.000001	N/A	256	4194304	0.024695	0.024265	0.009569	"0.009569 0.022267 0.024245 0.024263 0.024264 0.024265 0.024267 0.024269 0.024271 0.045266 "	0.008558	N/A	ComputeCpp	N/A
Polybench_2DConvolution	N/A	GeForce GTX TITAN X	0.005669	0.005668	0.005664	"0.005664 0.005665 0.005666 0.005667 0.005667 0.005668 0.005670 0.005672 0.005672 0.005676 "	0.000004	N/A	256	8192	0.094076	0.101958	0.023503	"0.023503 0.101658 0.101880 0.101931 0.101956 0.101958 0.101958 0.101969 0.101973 0.101976 "	0.024797	N/A	ComputeCpp	N/A
Polybench_2mm	N/A	GeForce GTX TITAN X	0.021410	0.022806	0.019257	"0.019257 0.019278 0.019299 0.019345 0.022795 0.022806 0.022810 0.022817 0.022839 0.022854 "	0.001821	N/A	256	1024	0.092328	0.100362	0.020005	"0.020005 0.100356 0.100359 0.100360 0.100361 0.100362 0.100363 0.100369 0.100370 0.100374 "	0.025412	N/A	ComputeCpp	N/A
Polybench_3DConvolution	N/A	GeForce GTX TITAN X	0.103231	0.103250	0.103133	"0.103133 0.103187 0.103196 0.103225 0.103246 0.103250 0.103257 0.103261 0.103278 0.103279 "	0.000047	N/A	256	1024	0.133039	0.134188	0.122915	"0.122915 0.134058 0.134134 0.134137 0.134159 0.134188 0.134190 0.134190 0.134200 0.134221 "	0.003558	N/A	ComputeCpp	N/A
Polybench_3mm	N/A	GeForce GTX TITAN X	0.028929	0.028922	0.028886	"0.028886 0.028887 0.028892 0.028896 0.028916 0.028922 0.028945 0.028963 0.028980 0.029001 "	0.000042	N/A	256	1024	0.100409	0.100409	0.100391	"0.100391 0.100401 0.100402 0.100403 0.100408 0.100409 0.100415 0.100418 0.100418 0.100422 "	0.000010	N/A	ComputeCpp	N/A
Polybench_Atax	N/A	GeForce GTX TITAN X	0.013905	0.014841	0.012434	"0.012434 0.012465 0.012484 0.012492 0.014754 0.014841 0.014884 0.014887 0.014904 0.014906 "	0.001237	N/A	256	8192	0.036331	0.029160	0.022637	"0.022637 0.028205 0.029115 0.029122 0.029151 0.029160 0.029205 0.030164 0.030216 0.106330 "	0.024691	N/A	ComputeCpp	N/A
Polybench_Bicg	N/A	GeForce GTX TITAN X	0.064851	0.064251	0.063862	"0.063862 0.064019 0.064065 0.064084 0.064187 0.064251 0.064252 0.064363 0.064367 0.071061 "	0.002188	N/A	256	16384	0.102279	0.104553	0.081840	"0.081840 0.104529 0.104534 0.104538 0.104538 0.104553 0.104557 0.104562 0.104562 0.104580 "	0.007182	N/A	ComputeCpp	N/A
Polybench_Correlation	N/A	GeForce GTX TITAN X	0.456731	0.456485	0.455941	"0.455941 0.456146 0.456151 0.456206 0.456229 0.456485 0.456741 0.457422 0.457488 0.458496 "	0.000820	N/A	256	1024	0.478103	0.479978	0.472070	"0.472070 0.476037 0.476959 0.477985 0.478044 0.479978 0.479985 0.479986 0.479989 0.479994 "	0.002576	N/A	ComputeCpp	N/A
Polybench_Covariance	N/A	GeForce GTX TITAN X	0.457357	0.457455	0.456184	"0.456184 0.456474 0.456532 0.456729 0.457335 0.457455 0.457579 0.457772 0.458136 0.459374 "	0.000951	N/A	256	1024	0.479325	0.480029	0.476001	"0.476001 0.478017 0.478019 0.478029 0.479042 0.480029 0.481026 0.481028 0.481028 0.481034 "	0.001774	N/A	ComputeCpp	N/A
Polybench_Fdtd2d	N/A	GeForce GTX TITAN X	0.151529	0.151695	0.150943	"0.150943 0.151086 0.151277 0.151392 0.151614 0.151695 0.151714 0.151718 0.151718 0.152137 "	0.000355	N/A	256	1024	0.590278	0.637645	0.460916	"0.460916 0.536807 0.537293 0.538043 0.637354 0.637645 0.637950 0.638115 0.638888 0.639766 "	0.065796	N/A	ComputeCpp	N/A
Polybench_Gemm	N/A	GeForce GTX TITAN X	0.011440	0.011438	0.011391	"0.011391 0.011411 0.011419 0.011426 0.011437 0.011438 0.011455 0.011462 0.011467 0.011490 "	0.000029	N/A	256	1024	0.092288	0.100316	0.020010	"0.020010 0.100314 0.100315 0.100315 0.100315 0.100316 0.100317 0.100320 0.100325 0.100329 "	0.025396	N/A	ComputeCpp	N/A
Polybench_Gesummv	N/A	GeForce GTX TITAN X	0.192465	0.192485	0.192085	"0.192085 0.192250 0.192287 0.192356 0.192406 0.192485 0.192551 0.192583 0.192812 0.192833 "	0.000239	N/A	256	16384	0.207784	0.207773	0.207754	"0.207754 0.207755 0.207758 0.207762 0.207771 0.207773 0.207781 0.207786 0.207840 0.207859 "	0.000036	N/A	ComputeCpp	N/A
Polybench_Gramschmidt	N/A	GeForce GTX TITAN X	0.823605	0.822403	0.821250	"0.821250 0.822025 0.822071 0.822079 0.822200 0.822403 0.822461 0.822485 0.822523 0.836549 "	0.004563	N/A	256	1024	3.713286	3.821086	3.233692	"3.233692 3.622522 3.720631 3.720752 3.722035 3.821086 3.821884 3.822633 3.823295 3.824332 "	0.182038	N/A	ComputeCpp	N/A
Polybench_Mvt	N/A	GeForce GTX TITAN X	0.115183	0.115336	0.114717	"0.114717 0.114783 0.114813 0.115080 0.115259 0.115336 0.115444 0.115449 0.115475 0.115477 "	0.000310	N/A	256	16384	0.196592	0.204907	0.121746	"0.121746 0.204873 0.204901 0.204905 0.204905 0.204907 0.204908 0.204912 0.204916 0.204946 "	0.026298	N/A	ComputeCpp	N/A
Polybench_Syr2k	N/A	GeForce GTX TITAN X	0.298046	0.309269	0.213993	"0.213993 0.288903 0.296407 0.305094 0.306358 0.309269 0.309539 0.311121 0.313533 0.326241 "	0.031152	N/A	256	1024	0.371688	0.400814	0.300643	"0.300643 0.300647 0.300659 0.400812 0.400813 0.400814 0.400821 0.400825 0.400845 0.410000 "	0.049103	N/A	ComputeCpp	N/A
Polybench_Syrk	N/A	GeForce GTX TITAN X	0.048470	0.048473	0.048352	"0.048352 0.048366 0.048375 0.048382 0.048385 0.048473 0.048550 0.048584 0.048588 0.048645 "	0.000112	N/A	256	1024	0.096279	0.100308	0.060020	"0.060020 0.100301 0.100301 0.100304 0.100307 0.100308 0.100309 0.100309 0.100313 0.100320 "	0.012740	N/A	ComputeCpp	N/A
