# Supplementary material
Source: publisher figshare collection journal article supplement (https://springernature.figshare.com/articles/dataset/_/12562670)
Supplement: Supplementary file 1 [file 1 › hipSYCL-sycl-bench-CPU.csv]

# Benchmark name	Verification	device-name	kernel-time-mean	kernel-time-median	kernel-time-min	kernel-time-samples	kernel-time-stddev	kernel-time-throughput	local-size	problem-size	run-time-mean	run-time-median	run-time-min	run-time-samples	run-time-stddev	run-time-throughput	sycl-implementation	throughput-metric
LinearRegressionCoeff_fp32	N/A	hipCPU OpenMP host device	N/A	N/A	N/A	N/A	N/A	N/A	256	2097152	94.069998	94.083199	93.635049	"93.635049 93.749291 93.919572 93.970085 93.986869 94.083199 94.247332 94.281707 94.335412 94.491465 "	0.269995	N/A	hipSYCL	N/A
LinearRegression_fp32	N/A	hipCPU OpenMP host device	N/A	N/A	N/A	N/A	N/A	N/A	256	131072	1.842637	1.901245	1.628759	"1.628759 1.735415 1.798892 1.824464 1.898107 1.901245 1.902929 1.904513 1.906635 1.925409 "	0.096843	N/A	hipSYCL	N/A
MedianFilter	N/A	hipCPU OpenMP host device	N/A	N/A	N/A	N/A	N/A	N/A	256	4096	1.071653	1.081310	1.007307	"1.007307 1.067746 1.071439 1.077180 1.078452 1.081310 1.081944 1.082430 1.083269 1.085455 "	0.023269	N/A	hipSYCL	N/A
MolecularDynamics	N/A	hipCPU OpenMP host device	N/A	N/A	N/A	N/A	N/A	N/A	256	4194304	0.055217	0.055873	0.046695	"0.046695 0.054545 0.055032 0.055067 0.055087 0.055873 0.056518 0.057311 0.057571 0.058468 "	0.003262	N/A	hipSYCL	N/A
ScalarProduct_Hierarchical_int32	N/A	hipCPU OpenMP host device	N/A	N/A	N/A	N/A	N/A	N/A	256	4194304	0.032119	0.032304	0.029987	"0.029987 0.031169 0.031244 0.032185 0.032273 0.032304 0.032374 0.032420 0.032513 0.034718 "	0.001217	N/A	hipSYCL	N/A
ScalarProduct_NDRange_int32	N/A	hipCPU OpenMP host device	N/A	N/A	N/A	N/A	N/A	N/A	256	4194304	51.328741	51.408430	51.033124	"51.033124 51.050309 51.225058 51.301082 51.316724 51.408430 51.415171 51.446524 51.456085 51.634901 "	0.186850	N/A	hipSYCL	N/A
Sobel3	N/A	hipCPU OpenMP host device	N/A	N/A	N/A	N/A	N/A	N/A	256	4096	0.122411	0.123043	0.117675	"0.117675 0.120151 0.120782 0.121270 0.122767 0.123043 0.123460 0.124674 0.125017 0.125272 "	0.002432	N/A	hipSYCL	N/A
Sobel5	N/A	hipCPU OpenMP host device	N/A	N/A	N/A	N/A	N/A	N/A	256	4096	0.206285	0.206608	0.202471	"0.202471 0.203462 0.204369 0.206280 0.206360 0.206608 0.206786 0.208398 0.208723 0.209397 "	0.002276	N/A	hipSYCL	N/A
Sobel7	N/A	hipCPU OpenMP host device	N/A	N/A	N/A	N/A	N/A	N/A	256	4096	0.326004	0.325608	0.322066	"0.322066 0.322075 0.322101 0.323011 0.324115 0.325608 0.326365 0.327751 0.332342 0.334611 "	0.004426	N/A	hipSYCL	N/A
VectorAddition_int32	N/A	hipCPU OpenMP host device	N/A	N/A	N/A	N/A	N/A	N/A	256	4194304	0.005065	0.004578	0.003195	"0.003195 0.003653 0.004026 0.004144 0.004524 0.004578 0.004694 0.006790 0.006816 0.008235 "	0.001639	N/A	hipSYCL	N/A
Polybench_2DConvolution	N/A	hipCPU OpenMP host device	N/A	N/A	N/A	N/A	N/A	N/A	256	8192	0.058919	0.059499	0.056054	"0.056054 0.056571 0.057889 0.058000 0.058611 0.059499 0.060071 0.060218 0.060224 0.062051 "	0.001843	N/A	hipSYCL	N/A
Polybench_2mm	N/A	hipCPU OpenMP host device	N/A	N/A	N/A	N/A	N/A	N/A	256	1024	0.555614	0.539999	0.525443	"0.525443 0.528378 0.531256 0.537796 0.539310 0.539999 0.549438 0.552024 0.557511 0.694988 "	0.050058	N/A	hipSYCL	N/A
Polybench_3DConvolution	N/A	hipCPU OpenMP host device	N/A	N/A	N/A	N/A	N/A	N/A	256	1024	1.901370	1.925725	1.725096	"1.725096 1.737260 1.747974 1.766903 1.916209 1.925725 1.962705 2.006328 2.108204 2.117294 "	0.150780	N/A	hipSYCL	N/A
Polybench_3mm	N/A	hipCPU OpenMP host device	N/A	N/A	N/A	N/A	N/A	N/A	256	1024	0.830399	0.818156	0.782856	"0.782856 0.788615 0.789055 0.792328 0.815124 0.818156 0.823421 0.826241 0.830269 1.037929 "	0.075043	N/A	hipSYCL	N/A
Polybench_Atax	N/A	hipCPU OpenMP host device	N/A	N/A	N/A	N/A	N/A	N/A	256	8192	0.149077	0.150138	0.144681	"0.144681 0.145761 0.145808 0.146594 0.148551 0.150138 0.151501 0.151965 0.152331 0.153436 "	0.003204	N/A	hipSYCL	N/A
Polybench_Bicg	N/A	hipCPU OpenMP host device	N/A	N/A	N/A	N/A	N/A	N/A	256	16384	0.591057	0.594760	0.543788	"0.543788 0.569452 0.586236 0.593394 0.593929 0.594760 0.600831 0.603240 0.605411 0.619526 "	0.021114	N/A	hipSYCL	N/A
Polybench_Correlation	N/A	hipCPU OpenMP host device	N/A	N/A	N/A	N/A	N/A	N/A	256	1024	0.171052	0.170791	0.169526	"0.169526 0.169665 0.169686 0.170098 0.170717 0.170791 0.171138 0.171318 0.173216 0.174367 "	0.001597	N/A	hipSYCL	N/A
Polybench_Covariance	N/A	hipCPU OpenMP host device	N/A	N/A	N/A	N/A	N/A	N/A	256	1024	0.163778	0.165130	0.158816	"0.158816 0.159971 0.162885 0.163521 0.163693 0.165130 0.165328 0.165515 0.165528 0.167398 "	0.002654	N/A	hipSYCL	N/A
Polybench_Fdtd2d	N/A	hipCPU OpenMP host device	N/A	N/A	N/A	N/A	N/A	N/A	256	1024	7.028278	7.078307	6.765117	"6.765117 6.886947 6.957624 7.035650 7.052618 7.078307 7.082480 7.099844 7.127363 7.196830 "	0.126340	N/A	hipSYCL	N/A
Polybench_Gemm	N/A	hipCPU OpenMP host device	N/A	N/A	N/A	N/A	N/A	N/A	256	1024	0.284355	0.278699	0.271227	"0.271227 0.272661 0.276834 0.277650 0.278292 0.278699 0.279177 0.279470 0.279564 0.349977 "	0.023236	N/A	hipSYCL	N/A
Polybench_Gesummv	N/A	hipCPU OpenMP host device	N/A	N/A	N/A	N/A	N/A	N/A	256	16384	0.121174	0.121709	0.117856	"0.117856 0.118721 0.120619 0.120629 0.120688 0.121709 0.122237 0.122395 0.122827 0.124063 "	0.001881	N/A	hipSYCL	N/A
Polybench_Gramschmidt	N/A	hipCPU OpenMP host device	N/A	N/A	N/A	N/A	N/A	N/A	256	1024	15.209141	15.209843	15.021908	"15.021908 15.082633 15.087621 15.087981 15.145713 15.209843 15.277242 15.281693 15.295064 15.601708 "	0.168630	N/A	hipSYCL	N/A
Polybench_Mvt	N/A	hipCPU OpenMP host device	N/A	N/A	N/A	N/A	N/A	N/A	256	16384	0.114174	0.111970	0.107594	"0.107594 0.110531 0.111271 0.111681 0.111742 0.111970 0.112664 0.113895 0.121000 0.129395 "	0.006347	N/A	hipSYCL	N/A
Polybench_Syr2k	N/A	hipCPU OpenMP host device	N/A	N/A	N/A	N/A	N/A	N/A	256	1024	0.129675	0.129057	0.128333	"0.128333 0.128436 0.128750 0.128945 0.129037 0.129057 0.129074 0.130908 0.131966 0.132247 "	0.001463	N/A	hipSYCL	N/A
Polybench_Syrk	N/A	hipCPU OpenMP host device	N/A	N/A	N/A	N/A	N/A	N/A	256	1024	0.200712	0.199144	0.197888	"0.197888 0.198775 0.198929 0.198984 0.199066 0.199144 0.199201 0.202822 0.205887 0.206421 "	0.003148	N/A	hipSYCL	N/A
