# Supplementary material
Source: publisher figshare collection journal article supplement (https://springernature.figshare.com/articles/dataset/_/12562670)
Supplement: Supplementary file 1 [file 1 › hipSYCL-sycl-bench-GPU.csv]

# Benchmark name	Verification	device-name	kernel-time-mean	kernel-time-median	kernel-time-min	kernel-time-samples	kernel-time-stddev	kernel-time-throughput	local-size	problem-size	run-time-mean	run-time-median	run-time-min	run-time-samples	run-time-stddev	run-time-throughput	sycl-implementation	throughput-metric
LinearRegressionCoeff_fp32	N/A	GeForce GTX TITAN X	N/A	N/A	N/A	N/A	N/A	N/A	256	2097152	0.009287	0.009246	0.008693	0.008693 0.008778 0.008988 0.009016 0.009068 0.009246 0.009470 0.009830 0.009890 0.009894	0.000458	N/A	hipSYCL	N/A
LinearRegression_fp32	N/A	GeForce GTX TITAN X	N/A	N/A	N/A	N/A	N/A	N/A	256	131072	0.092846	0.092688	0.091357	0.091357 0.091826 0.092217 0.092507 0.092511 0.092688 0.092751 0.092913 0.093360 0.096331	0.001347	N/A	hipSYCL	N/A
MedianFilter	N/A	GeForce GTX TITAN X	N/A	N/A	N/A	N/A	N/A	N/A	256	4096	0.01441	0.014414	0.014364	0.014364 0.014385 0.014392 0.014402 0.014407 0.014414 0.014431 0.014432 0.014434 0.014439	2.5E-05	N/A	hipSYCL	N/A
MolecularDynamics	N/A	GeForce GTX TITAN X	N/A	N/A	N/A	N/A	N/A	N/A	256	4194304	0.004198	0.004202	0.004178	0.004178 0.004182 0.004184 0.004196 0.004201 0.004202 0.004202 0.004203 0.004210 0.004222	1.4E-05	N/A	hipSYCL	N/A
ScalarProduct_Hierarchical_int32	N/A	GeForce GTX TITAN X	N/A	N/A	N/A	N/A	N/A	N/A	256	4194304	0.001023	0.001024	0.00101	0.001010 0.001013 0.001016 0.001017 0.001017 0.001024 0.001024 0.001030 0.001030 0.001049	1.1E-05	N/A	hipSYCL	N/A
ScalarProduct_NDRange_int32	N/A	GeForce GTX TITAN X	N/A	N/A	N/A	N/A	N/A	N/A	256	4194304	0.001025	0.001021	0.001015	0.001015 0.001015 0.001016 0.001016 0.001020 0.001021 0.001022 0.001025 0.001027 0.001074	1.8E-05	N/A	hipSYCL	N/A
Sobel3	N/A	GeForce GTX TITAN X	N/A	N/A	N/A	N/A	N/A	N/A	256	4096	0.020721	0.02071	0.020674	0.020674 0.020698 0.020701 0.020705 0.020709 0.020710 0.020715 0.020742 0.020746 0.020808	3.7E-05	N/A	hipSYCL	N/A
Sobel5	N/A	GeForce GTX TITAN X	N/A	N/A	N/A	N/A	N/A	N/A	256	4096	0.053139	0.053171	0.052813	0.052813 0.053008 0.053010 0.053103 0.053166 0.053171 0.053185 0.053245 0.053289 0.053398	0.000165	N/A	hipSYCL	N/A
Sobel7	N/A	GeForce GTX TITAN X	N/A	N/A	N/A	N/A	N/A	N/A	256	4096	0.072683	0.07291	0.071718	0.071718 0.072154 0.072532 0.072673 0.072902 0.072910 0.072923 0.072966 0.073015 0.073037	0.000436	N/A	hipSYCL	N/A
VectorAddition_int32	N/A	GeForce GTX TITAN X	N/A	N/A	N/A	N/A	N/A	N/A	256	4194304	0.000368	0.000369	0.000317	0.000317 0.000324 0.000364 0.000368 0.000369 0.000369 0.000372 0.000381 0.000404 0.000412	3E-05	N/A	hipSYCL	N/A
Polybench_2DConvolution	N/A	GeForce GTX TITAN X	N/A	N/A	N/A	N/A	N/A	N/A	256	8192	0.005582	0.005443	0.00542	0.005420 0.005425 0.005426 0.005434 0.005437 0.005443 0.005445 0.005664 0.005856 0.006270	0.000281	N/A	hipSYCL	N/A
Polybench_2mm	N/A	GeForce GTX TITAN X	N/A	N/A	N/A	N/A	N/A	N/A	256	1024	0.021565	0.021567	0.021485	0.021485 0.021493 0.021532 0.021543 0.021560 0.021567 0.021575 0.021623 0.021637 0.021638	5.5E-05	N/A	hipSYCL	N/A
Polybench_3DConvolution	N/A	GeForce GTX TITAN X	N/A	N/A	N/A	N/A	N/A	N/A	256	1024	0.140198	0.140199	0.140179	0.140179 0.140184 0.140190 0.140193 0.140195 0.140199 0.140207 0.140208 0.140208 0.140214	1.1E-05	N/A	hipSYCL	N/A
Polybench_3mm	N/A	GeForce GTX TITAN X	N/A	N/A	N/A	N/A	N/A	N/A	256	1024	0.031912	0.031897	0.031817	0.031817 0.031849 0.031863 0.031875 0.031886 0.031897 0.031976 0.031980 0.031981 0.031995	6.5E-05	N/A	hipSYCL	N/A
Polybench_Atax	N/A	GeForce GTX TITAN X	N/A	N/A	N/A	N/A	N/A	N/A	256	8192	0.011897	0.011493	0.011379	0.011379 0.011419 0.011456 0.011467 0.011485 0.011493 0.011549 0.011561 0.013576 0.013589	0.00089	N/A	hipSYCL	N/A
Polybench_Bicg	N/A	GeForce GTX TITAN X	N/A	N/A	N/A	N/A	N/A	N/A	256	16384	0.07042	0.069773	0.06948	0.069480 0.069560 0.069614 0.069717 0.069745 0.069773 0.069812 0.069839 0.070128 0.076536	0.002156	N/A	hipSYCL	N/A
Polybench_Correlation	N/A	GeForce GTX TITAN X	N/A	N/A	N/A	N/A	N/A	N/A	256	1024	0.419624	0.41884	0.417306	0.417306 0.417955 0.418283 0.418394 0.418665 0.418840 0.418935 0.419200 0.420422 0.428242	0.003137	N/A	hipSYCL	N/A
Polybench_Covariance	N/A	GeForce GTX TITAN X	N/A	N/A	N/A	N/A	N/A	N/A	256	1024	0.415346	0.415456	0.412869	0.412869 0.414358 0.414448 0.415331 0.415378 0.415456 0.415838 0.416013 0.416700 0.417064	0.00122	N/A	hipSYCL	N/A
Polybench_Fdtd2d	N/A	GeForce GTX TITAN X	N/A	N/A	N/A	N/A	N/A	N/A	256	1024	0.248786	0.248771	0.248591	0.248591 0.248612 0.248624 0.248759 0.248765 0.248771 0.248828 0.248858 0.249023 0.249023	0.000155	N/A	hipSYCL	N/A
Polybench_Gemm	N/A	GeForce GTX TITAN X	N/A	N/A	N/A	N/A	N/A	N/A	256	1024	0.012564	0.012797	0.011487	0.011487 0.011521 0.012732 0.012735 0.012783 0.012797 0.012839 0.012851 0.012885 0.013007	0.000564	N/A	hipSYCL	N/A
Polybench_Gesummv	N/A	GeForce GTX TITAN X	N/A	N/A	N/A	N/A	N/A	N/A	256	16384	0.205984	0.205988	0.2053	0.205300 0.205342 0.205486 0.205540 0.205787 0.205988 0.206119 0.206247 0.206326 0.207707	0.00071	N/A	hipSYCL	N/A
Polybench_Gramschmidt	N/A	GeForce GTX TITAN X	N/A	N/A	N/A	N/A	N/A	N/A	256	1024	0.835919	0.834975	0.832039	0.832039 0.832909 0.833659 0.834256 0.834718 0.834975 0.837221 0.838971 0.840148 0.840290	0.003024	N/A	hipSYCL	N/A
Polybench_Mvt	N/A	GeForce GTX TITAN X	N/A	N/A	N/A	N/A	N/A	N/A	256	16384	0.125798	0.125961	0.125065	0.125065 0.125374 0.125512 0.125598 0.125644 0.125961 0.125979 0.126166 0.126279 0.126398	0.000428	N/A	hipSYCL	N/A
Polybench_Syr2k	N/A	GeForce GTX TITAN X	N/A	N/A	N/A	N/A	N/A	N/A	256	1024	0.054018	0.054041	0.053831	0.053831 0.053862 0.053904 0.053980 0.054030 0.054041 0.054069 0.054123 0.054156 0.054180	0.000122	N/A	hipSYCL	N/A
Polybench_Syrk	N/A	GeForce GTX TITAN X	N/A	N/A	N/A	N/A	N/A	N/A	256	1024	0.029355	0.029364	0.029271	0.029271 0.029291 0.029299 0.029328 0.029331 0.029364 0.029392 0.029408 0.029428 0.029435	5.9E-05	N/A	hipSYCL	N/A
